# Supplementary material for: Correction to: FLAGS, frequently mutated genes in public exomes
Source: PubMed Central journal article supplement (PMC5706417; doi:10.1186/s12920-017-0309-7), 2017-11-29
Supplement: 12920_2017_309_MOESM13_ESM.pdf [file 12920_2017_309_MOESM13_ESM.pdf]

## **S1. Distribution of variants across genes**

For each gene, only rare coding variants derived from dbSNPv138 and EVS (including short insertions/deletions, i.e. indels) within the longest coding transcript that results in amino acid change were considered. Polymorphic alleles were excluded based on the same allelic frequency criteria as described above. The location of the affected amino acid was derived from annotation by SNPeff[1] software (as described above). For indels, only the first affected amino acid location was considered, such that if an indel affected multiple amino acids, we only considered the location of the first one. To achieve meaningful statistical evaluations, any gene with  $< 20$  remaining variants was not included in this part of the analysis. For each gene with  $\geq 20$  remaining variants, the same number of variants was randomly selected uniformly across the gene using Python version 2.7 `random.randrange` function. Mann-Whitney two-sided test was conducted between the locations of the observed mutations versus the locations from randomly selected ones using SciPy's[2] `mannwhitneyu` function. The p-value from this test was recorded, and the procedure repeated 20,000 times. Treating the p-value as a score, the p-value from this list corresponding to 99% statistical confidence was determined, reflecting how likely is the distribution of the observed variants to deviate from the uniform distribution. A Bonferroni multiple testing correction was applied when interpreting the significance of each p-value.
